# Supplementary figures and images for: The Effect of a Combined Mindfulness and Yoga Intervention on Soldier Mental Health in Basic Combat Training: A Cluster Randomized Controlled Trial
Source: Hindawi journal article supplement (doi:10.1155/2023/6869543), 2023-12-01

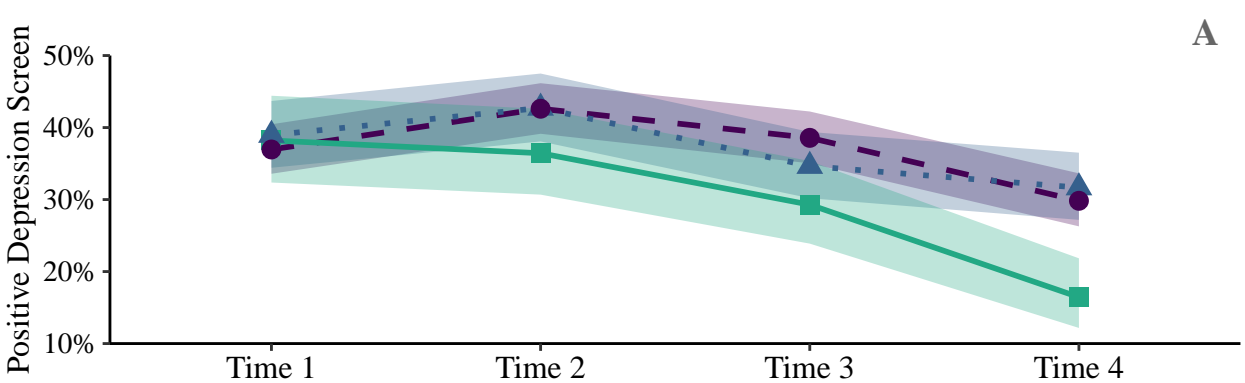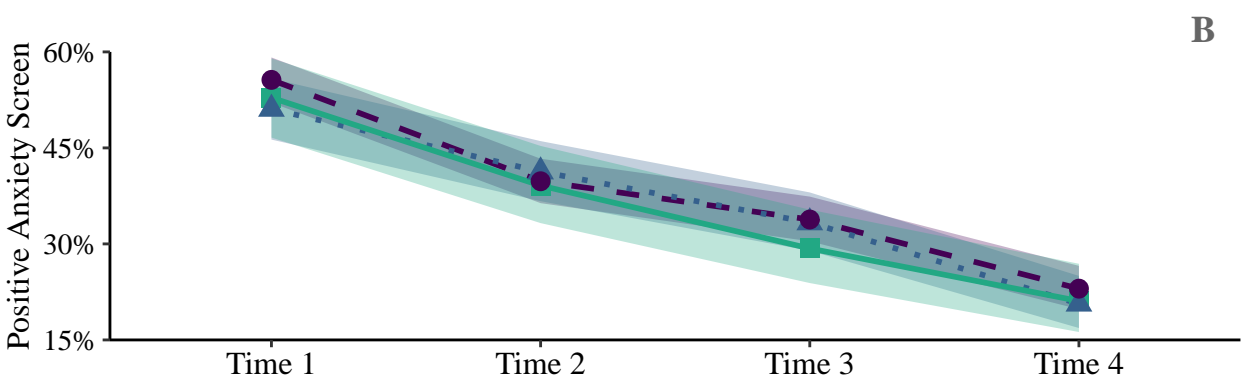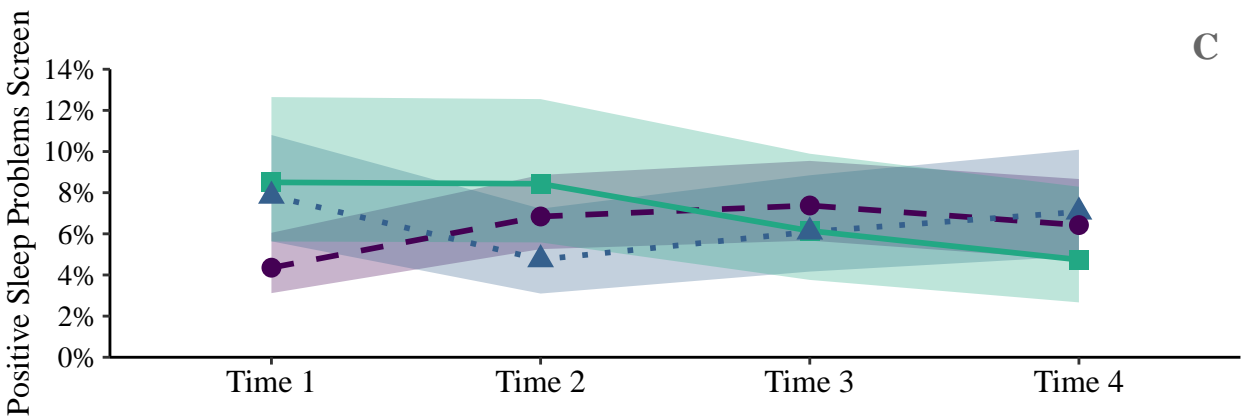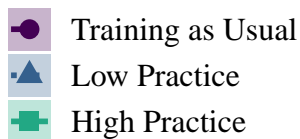

Supplement: f1 [file 6869543.f1.zip]

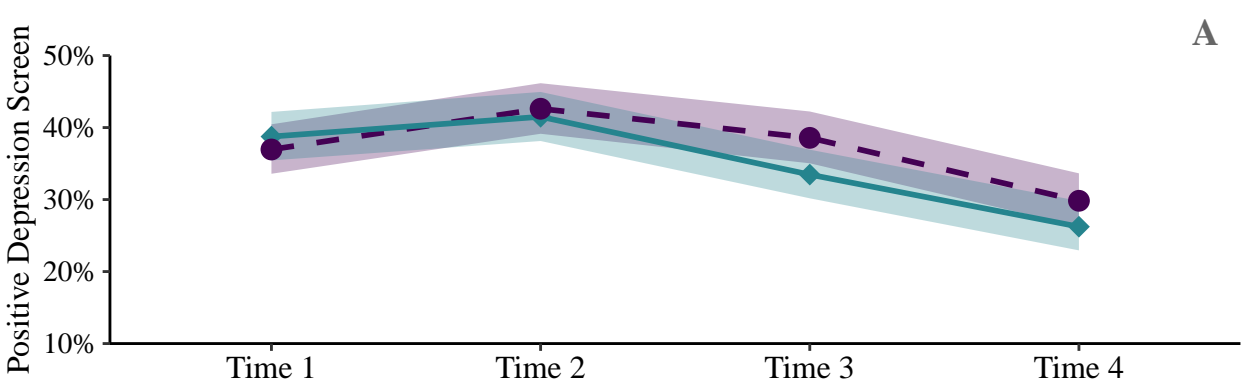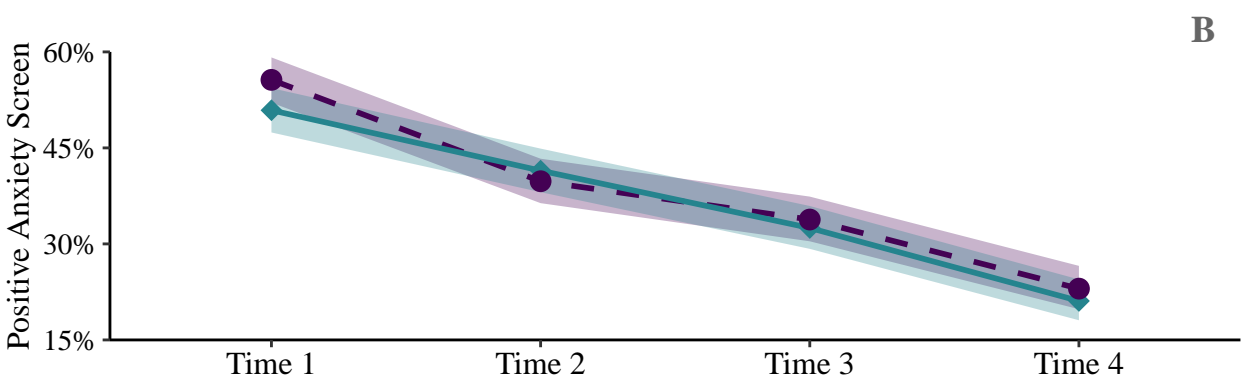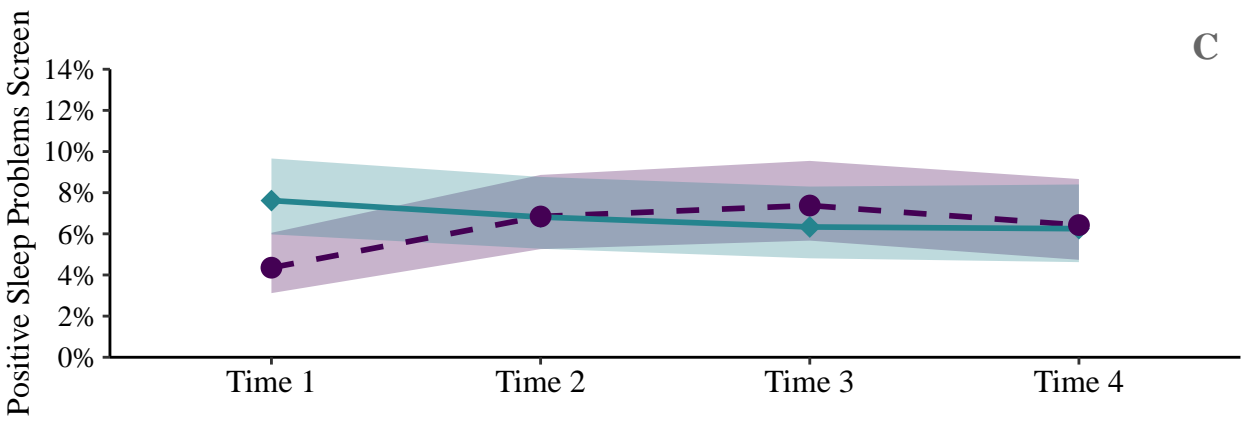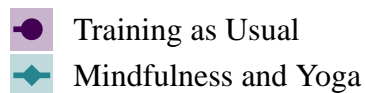

Supplement: f1 [file 6869543.f1.zip]
